# Supplementary material for: High brightness solution-processed OLEDs employing linear, small molecule emitters
Source: Royal Society of Chemistry journal article supplement (doi:10.1039/c5tc03579a), 2016-01-01

# **High Brightness Solution-Processed OLEDs Employing Linear, Small Molecule Emitters**

N. J. Findlay, B. Breig, C. Forbes, A. R. Inigo, A. L. Kanibolotsky and P. J. Skabara

## **Supporting Information**

Figure S1: Thermogravimetric analysis of Green 1.

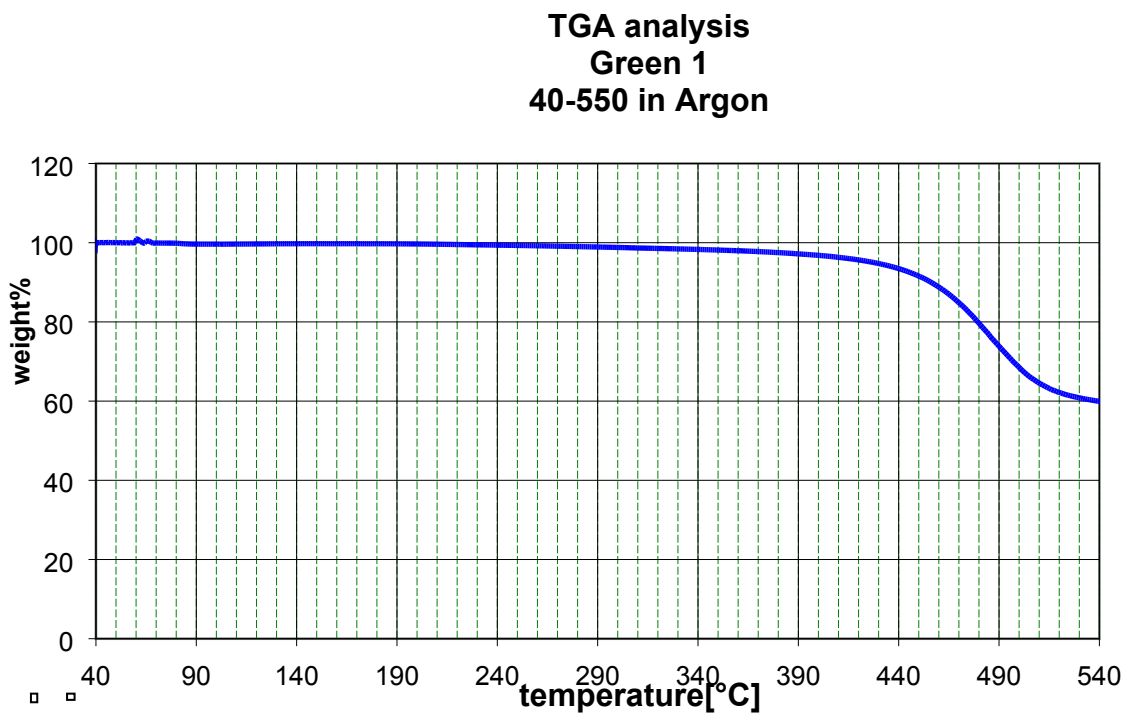

Figure S2: Thermogravimetric analysis of Green 2.

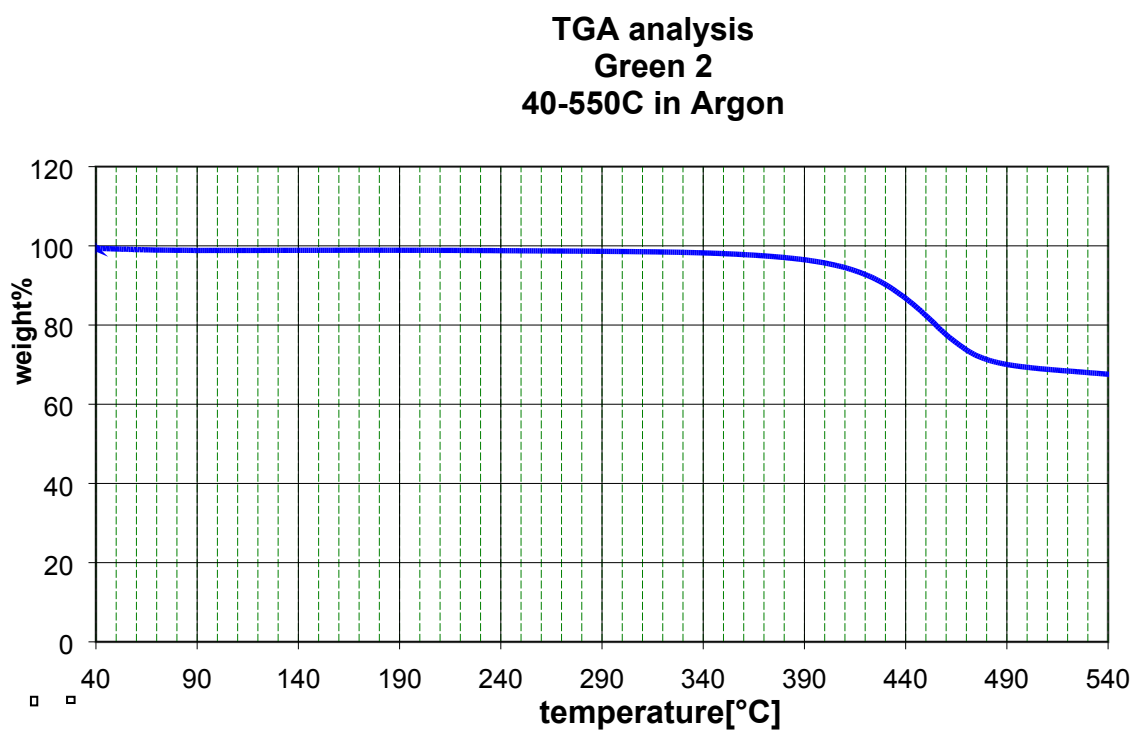

**Figure S3:** Differential scanning calorimetry of **Green 1**.

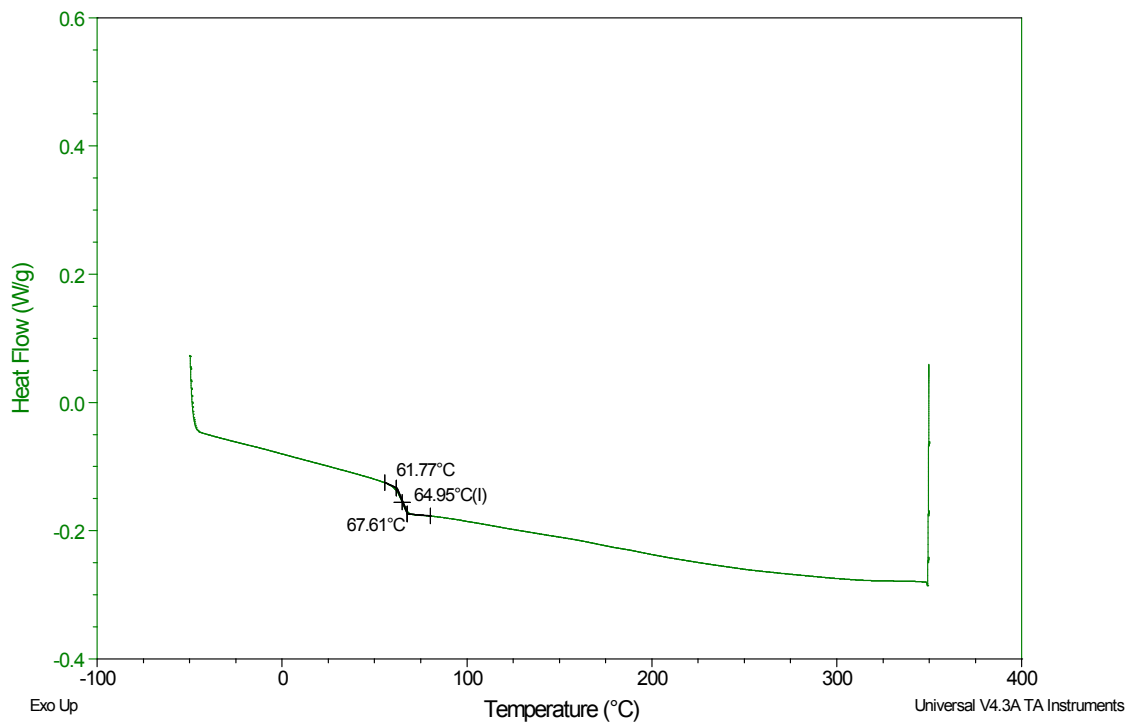

**Figure S4:** Differential scanning calorimetry of **Green 2**.

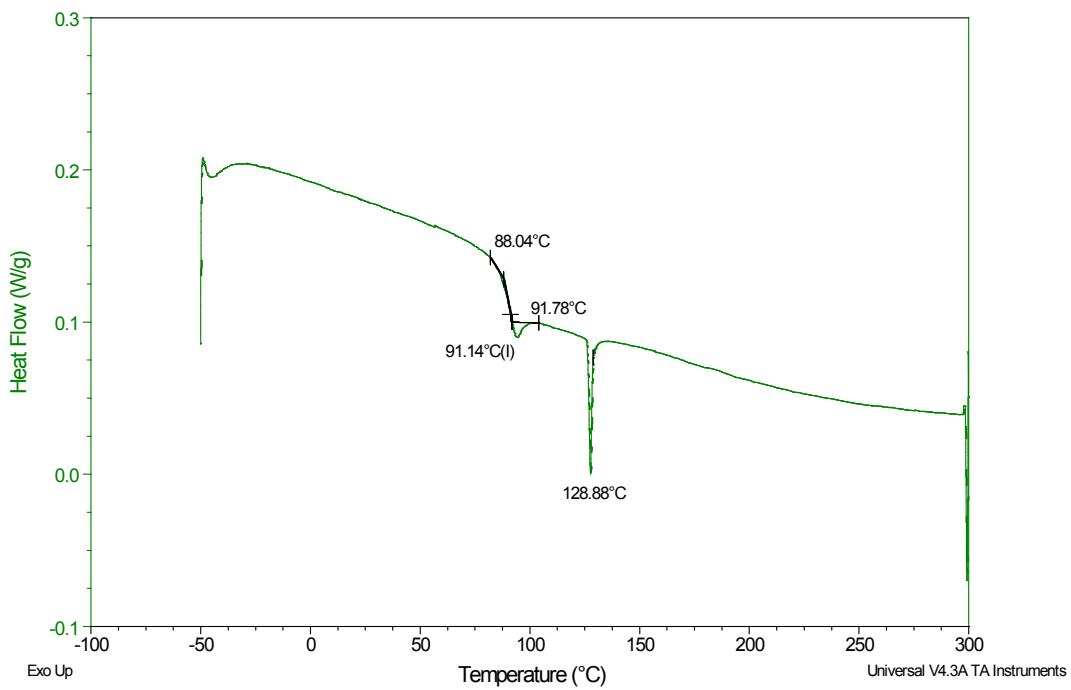

**Figure S5:** Oxidation profile of **Green 1** in dichloromethane ( $10^{-4}$  M), using a glassy carbon, platinum wire and Ag wire as the working, counter and pseudo-reference electrodes respectively, with  $(n\text{Bu})_4\text{PF}_6$  as the electrolyte in dichloromethane solution (0.1 M) at a scan rate of 100 mV/s. The data were referenced to the  $\text{Fc}/\text{Fc}^+$  redox couple, which has a HOMO of -4.8 eV.

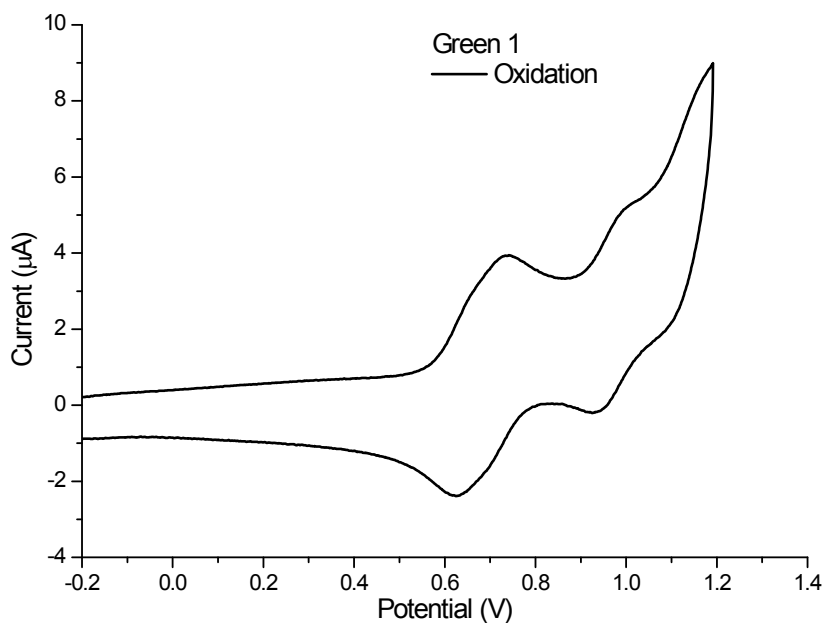

**Figure S6:** Reduction profile of **Green 1** in dichloromethane ( $10^{-4}$  M), using a glassy carbon, platinum wire and Ag wire as the working, counter and pseudo-reference electrodes respectively, with  $(n\text{Bu})_4\text{PF}_6$  as the electrolyte in dichloromethane solution (0.1 M) at a scan rate of 100 mV/s. The data were referenced to the  $\text{Fc}/\text{Fc}^+$  redox couple, which has a HOMO of -4.8 eV.

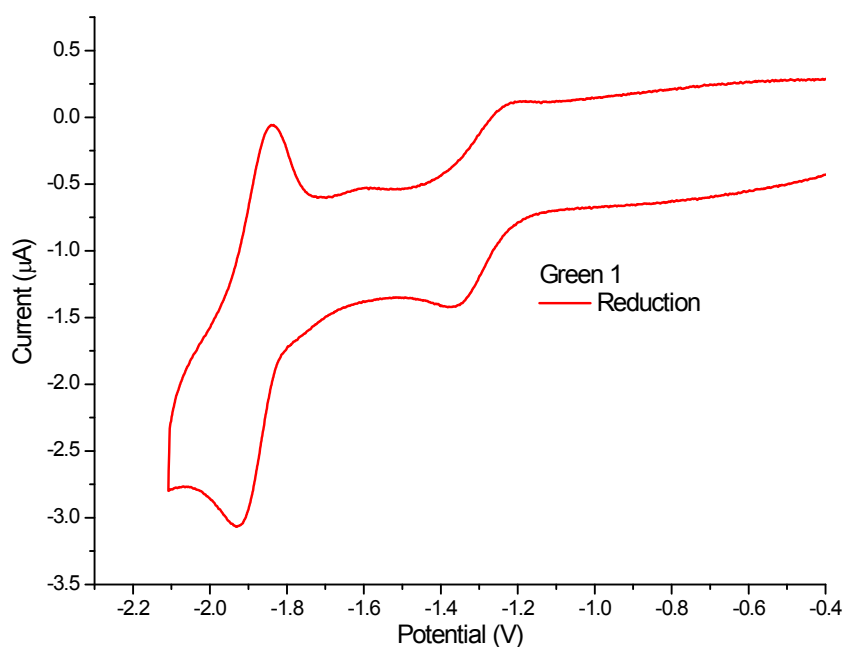

**Figure S7:** Oxidation profile of **Green 2** in dichloromethane ( $10^{-4}$  M), using a glassy carbon, platinum wire and Ag wire as the working, counter and pseudo-reference electrodes respectively, with  $(n\text{Bu})_4\text{PF}_6$  as the electrolyte in dichloromethane solution (0.1 M) at a scan rate of 100 mV/s. The data were referenced to the  $\text{Fc}/\text{Fc}^+$  redox couple, which has a HOMO of -4.8 eV.

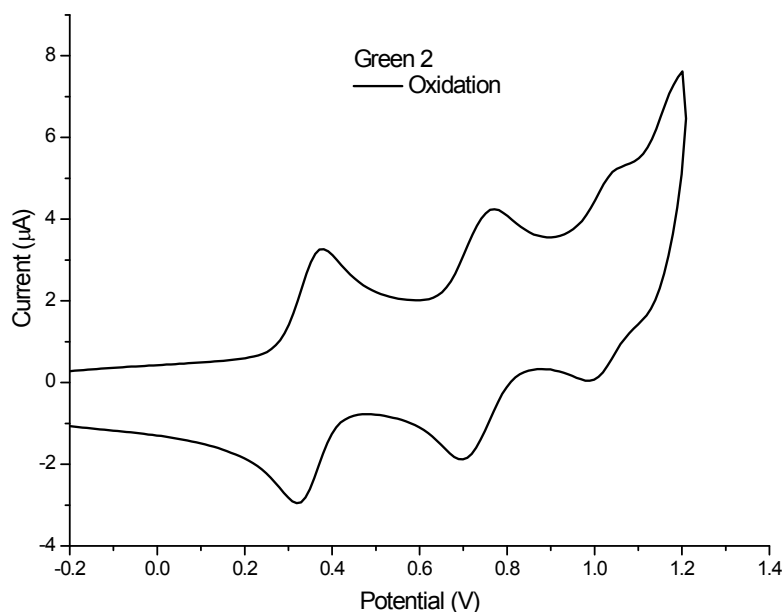

**Figure S8:** Reduction profile of **Green 2** in dichloromethane ( $10^{-4}$  M), using a glassy carbon, platinum wire and Ag wire as the working, counter and pseudo-reference electrodes respectively, with  $(n\text{Bu})_4\text{PF}_6$  as the electrolyte in dichloromethane solution (0.1 M) at a scan rate of 100 mV/s. The data were referenced to the  $\text{Fc}/\text{Fc}^+$  redox couple, which has a HOMO of -4.8 eV.

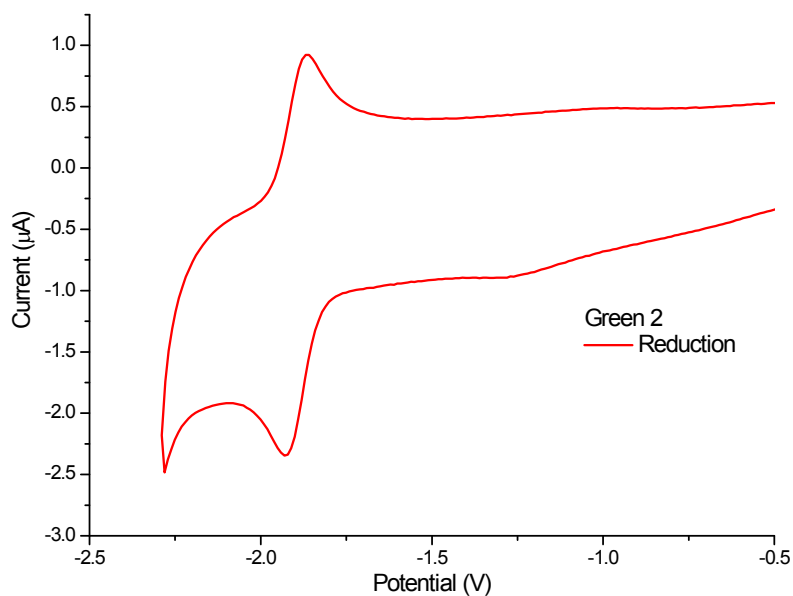

**Figure S9:** schematic energy level diagram of **Green 1** and **Green 2** device architectures.

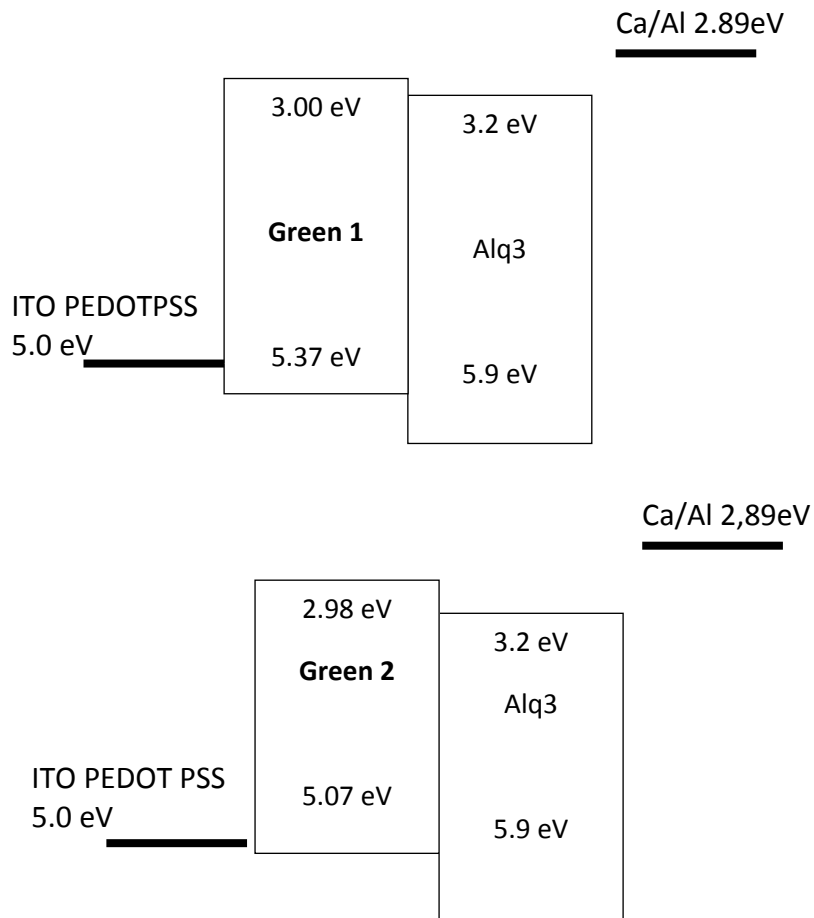

**Figure S10:** log - log plot of JV characteristics of **Green 1** and **Green 2** devices.

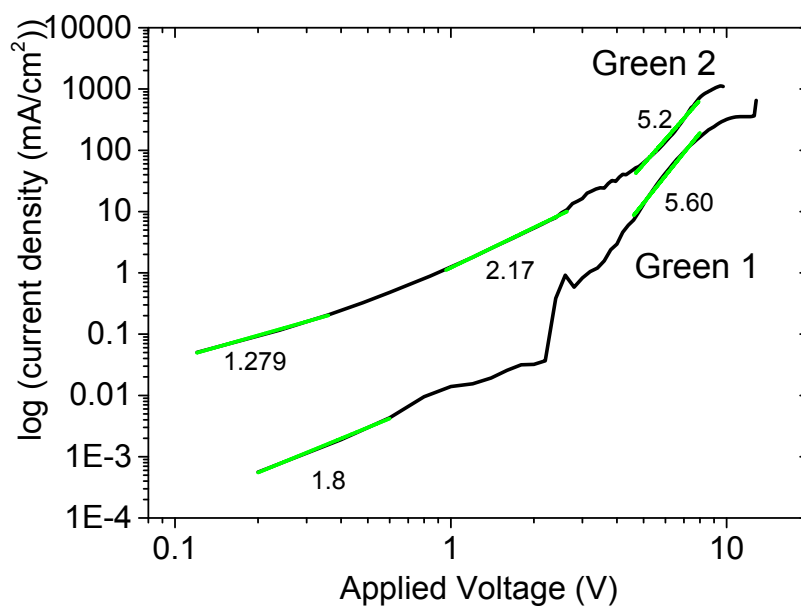

**Figure S11:** Current density – voltage - electroluminescence (JVL) characteristics of unannealed and annealed **Green 1** with device architectures of ITO/PEDOT-PSS/**Green1**/ Ca/Al.

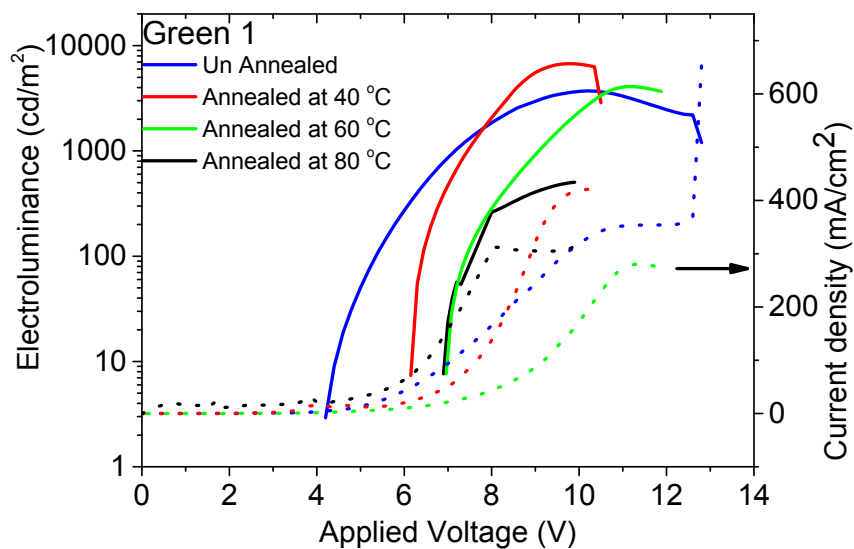

**Figure S12:** Current density – voltage - electroluminescence (JVL) characteristics of of unannealed and annealed **Green 2** with device architectures of ITO/PEDOT-PSS/**Green2**/Ca/Al.

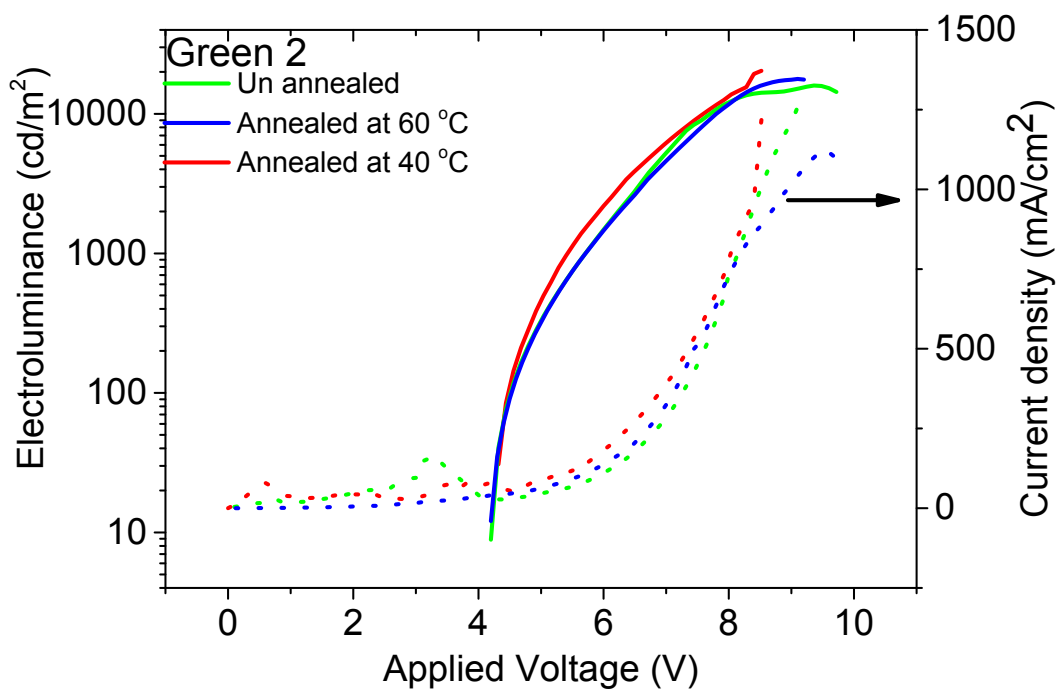

**Figure S13a:** Current efficiency – voltage characteristics of unannealed and annealed **Green 1** devices with device architectures of ITO/PEDOT-PSS/**Green1**/Ca/Al.

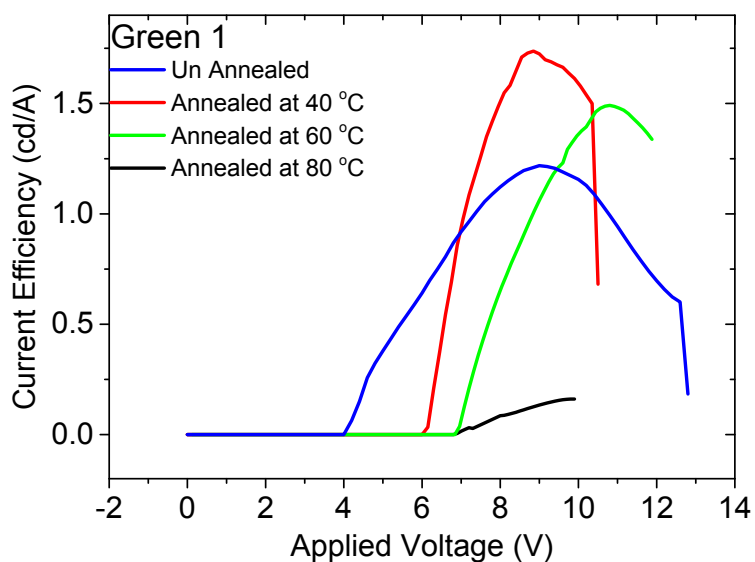

**Figure S13b:** External quantum efficiency (EQE) – current density characteristics of un-annealed and annealed **Green 1** devices with device architectures of ITO/PEDOT-PSS/**Green 1**/Ca/Al.

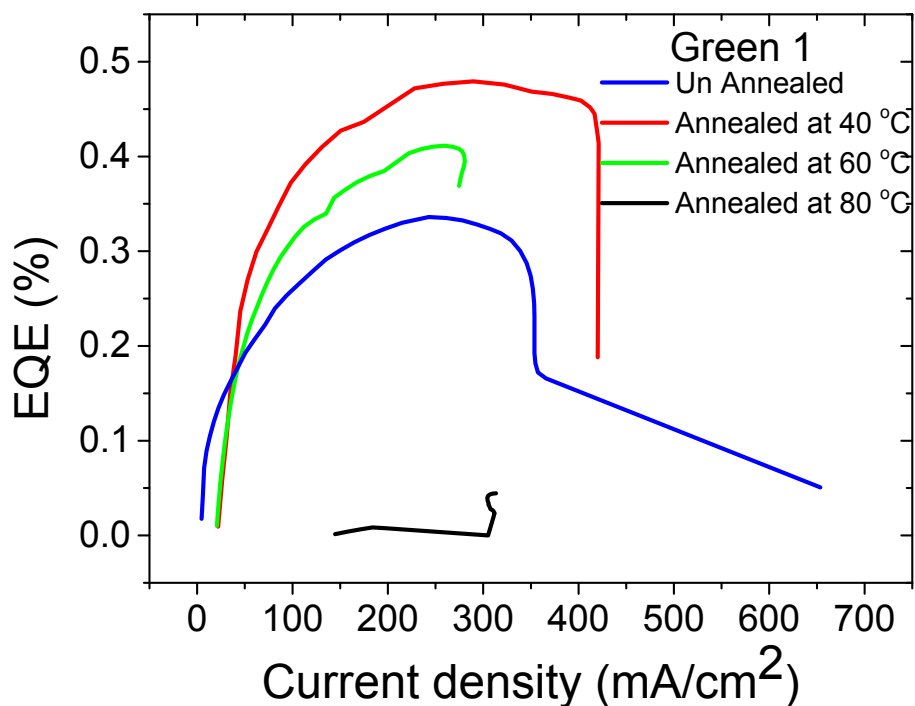



**Figure S14a:** Current efficiency – voltage characteristics of unannealed and annealed **Green 2** devices with device architectures of ITO/PEDOT-PSS/**Green2**/Ca/Al.

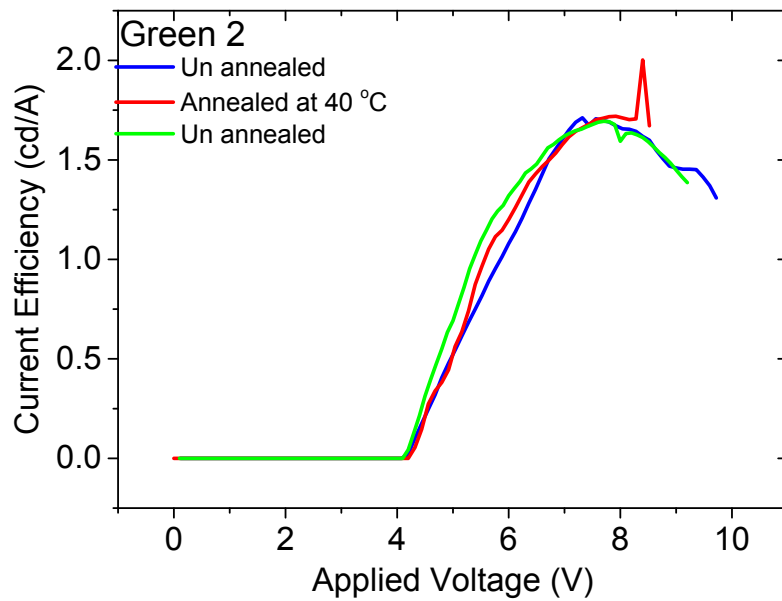

**Figure S14b:** External quantum efficiency (EQE) – current density characteristics of unannealed and annealed **Green 2** devices with device architectures of ITO/PEDOT-PSS/**Green 2**/Ca/Al.

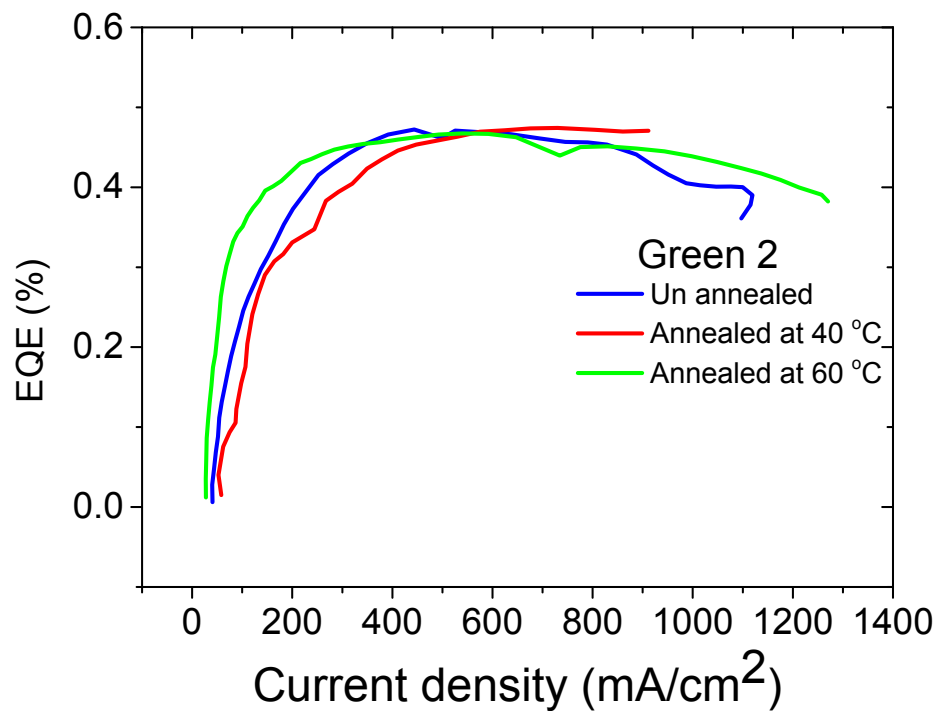

**Figure S15:** Current density – voltage - electroluminescence (JVL) characteristics of **Green 1** and **Green 2** with device architectures of ITO/PEDOT-PSS/**Green**/Alq3/Ca/Al.

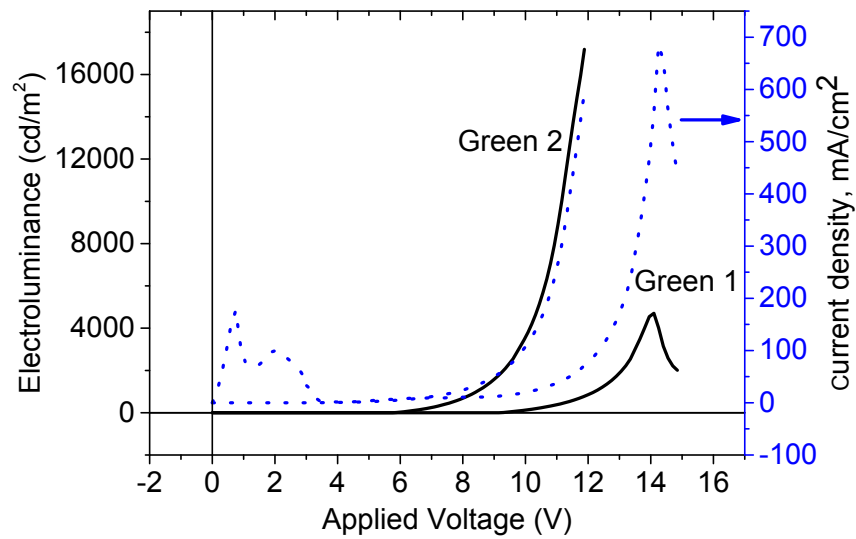

**Figure S16a:** Current efficiency – voltage characteristics of **Green 1** and **Green 2** with device architectures of ITO/PEDOT-PSS/**Green**/Alq3/Ca/Al.

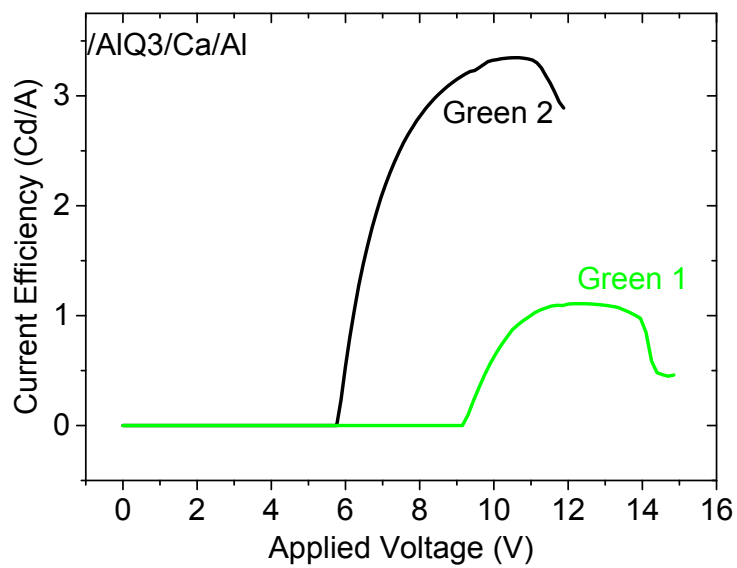

**Figure S16b:** External quantum efficiency (EQE) – current density characteristics of **Green 1** and **Green 2** with device architectures of ITO/PEDOT-PSS/**Green**/Alq3/Ca/Al.

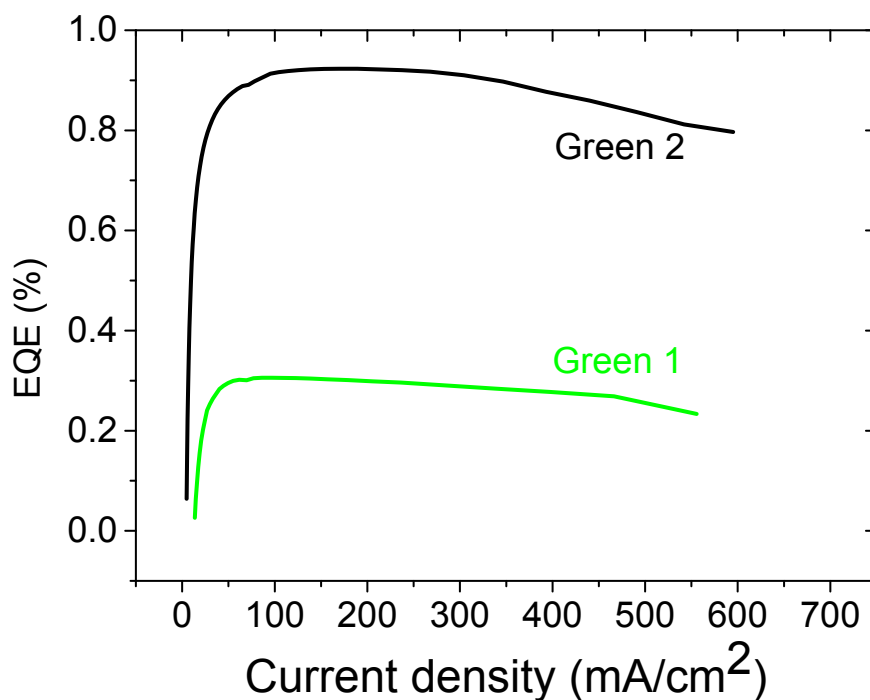

**Table S1:** Summary of absolute PLQY values (solid state) and CIE coordinates for **Green 1** and **Green 2** devices (ITO/PEDOT-PSS/**Green**/Ca/Al). PLQY recorded at excitation wavelengths of 346 and 365 nm for **Green 1** and **Green 2**, respectively.

| Material       | PLQY  | CIE                             |
|----------------|-------|---------------------------------|
| <b>Green1</b>  | 90.4% | X = 0.424; Y = 0.555; Z = 0.021 |
| <b>Green 2</b> | 73.7% | X = 0.432; Y = 0.552; Z = 0.016 |

**Table S2:** Summary of maximum luminance vs annealing temperature for **Green 1** and **Green 2** devices with the device architecture of ITO/PEDOT-PSS/**Green 1** or **2/Alq3**/Ca/Al, with annealing at 40 °C.

| Material       | Turn on at 10 cd/m <sup>2</sup> (V) | Maximum Luminance (cd/m <sup>2</sup> ) | Maximum current efficiency (cd/A) | Maximum EQE (%) |
|----------------|-------------------------------------|----------------------------------------|-----------------------------------|-----------------|
| <b>Green1</b>  | 9.27                                | 4702 @ 14.10 V                         | 1.11 @ 12.18 V                    | 0.31 @ 12.15 V  |
| <b>Green 2</b> | 5.87                                | 17189@ 11.9 V                          | 3.47 @ 10.68 V                    | 0.92 @ 10.68 V  |

Figure S17: <sup>1</sup>H NMR spectrum of Green 1.

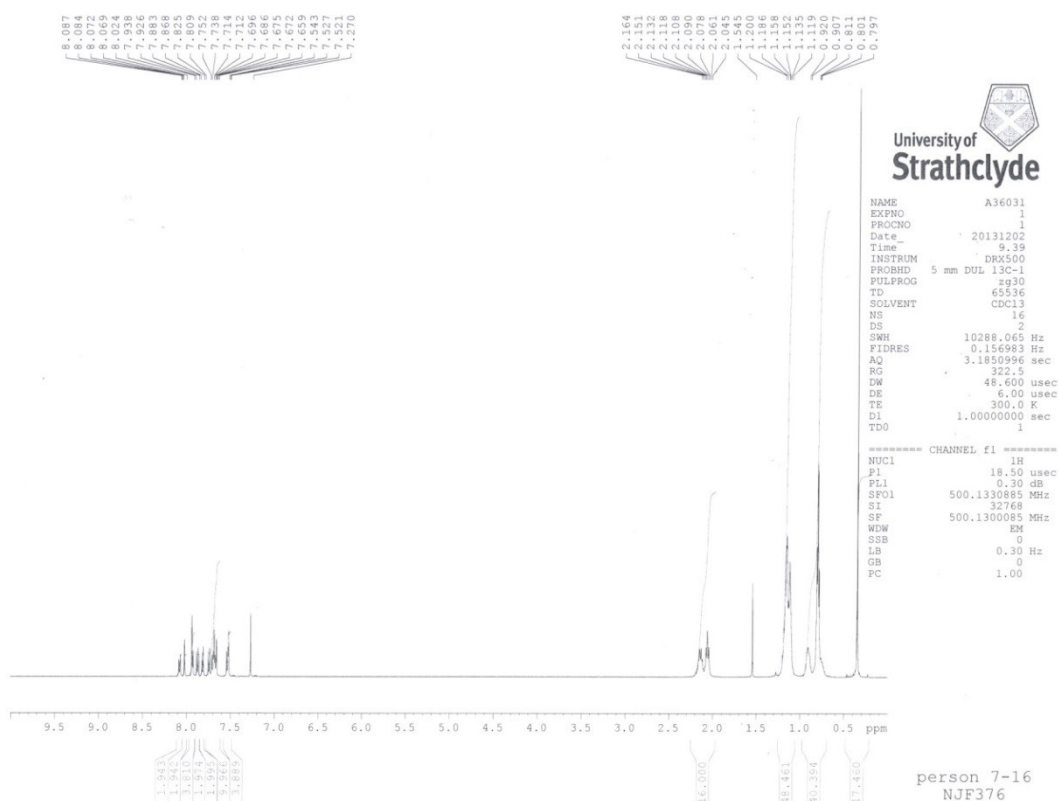

Figure S18: <sup>1</sup>H NMR spectrum of Green 2.

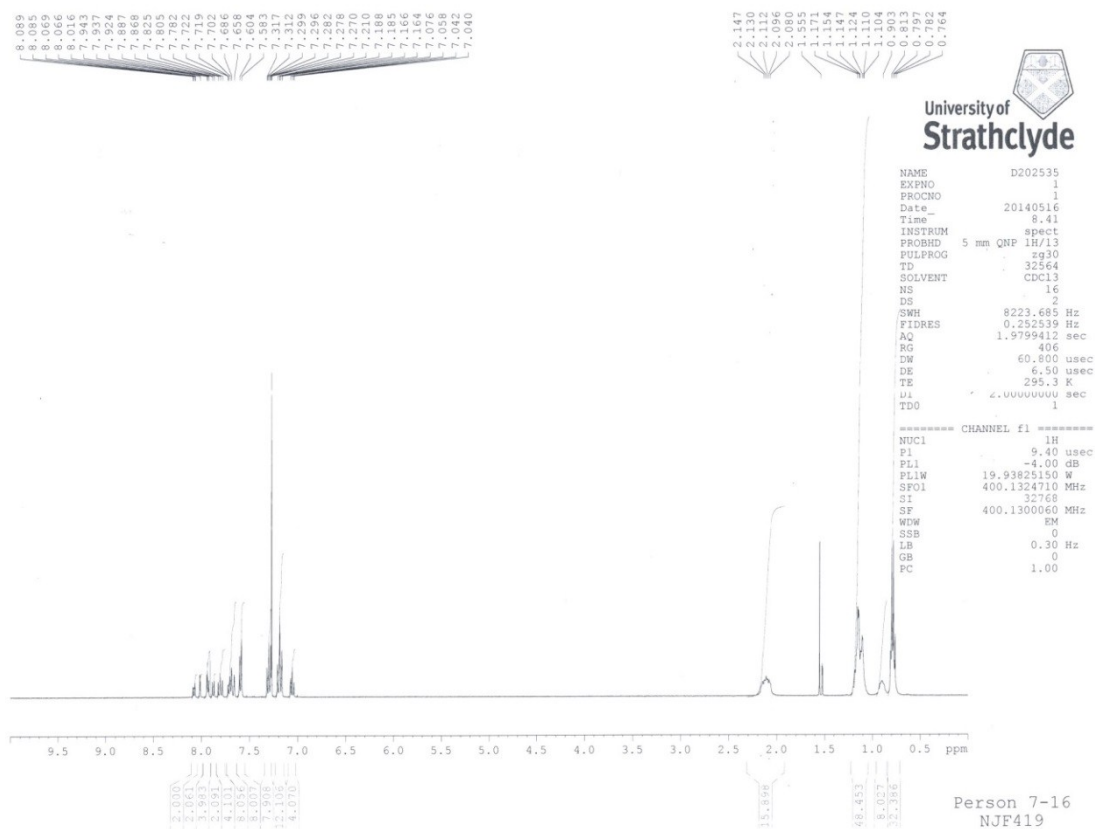

Figure S19: <sup>1</sup>H NMR spectrum of compound 3.

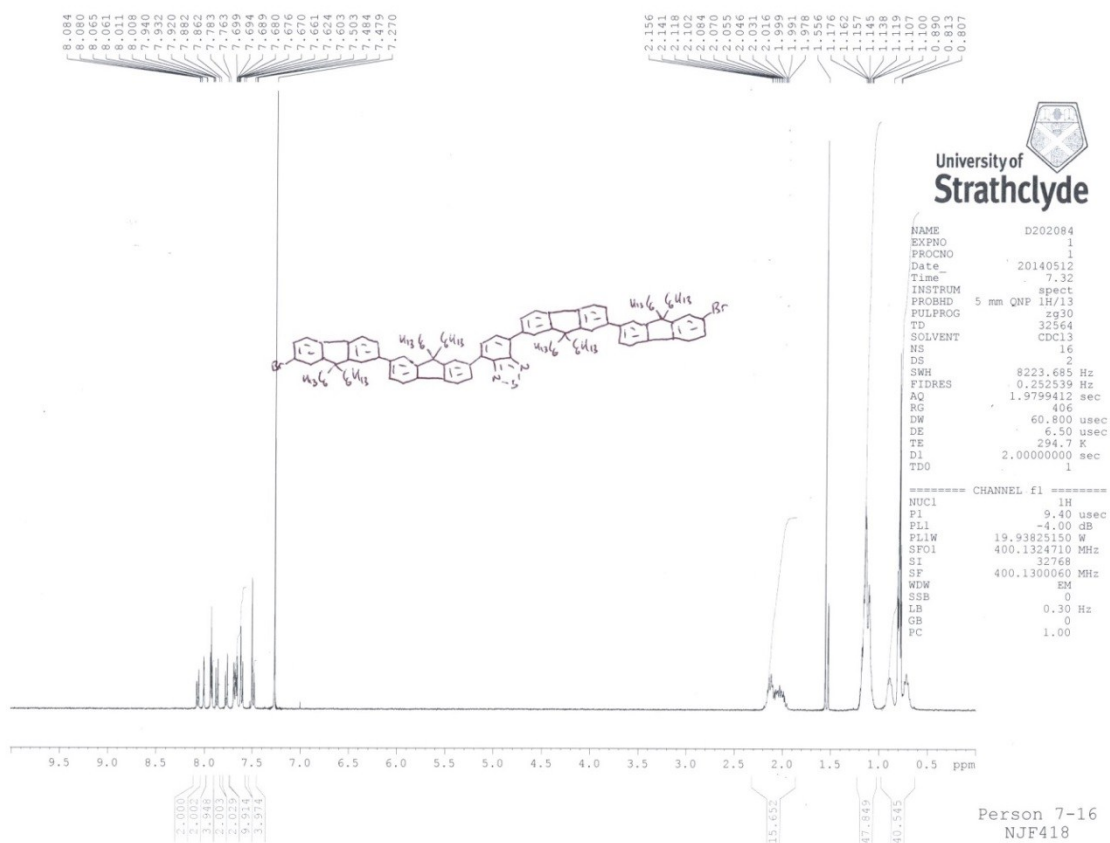

Supplement: c5tc03579a1.pdf [file c5tc03579a1.pdf]
